# Supplementary material
Source: HighWire-hosted journal article supplement (https://www.jneurosci.org/highwire/filestream/600591/field_highwire_adjunct_files/0/Supplemental_Figure.pdf)
Supplement: Supplemental_Figure.pdf [file Supplemental_Figure.pdf]

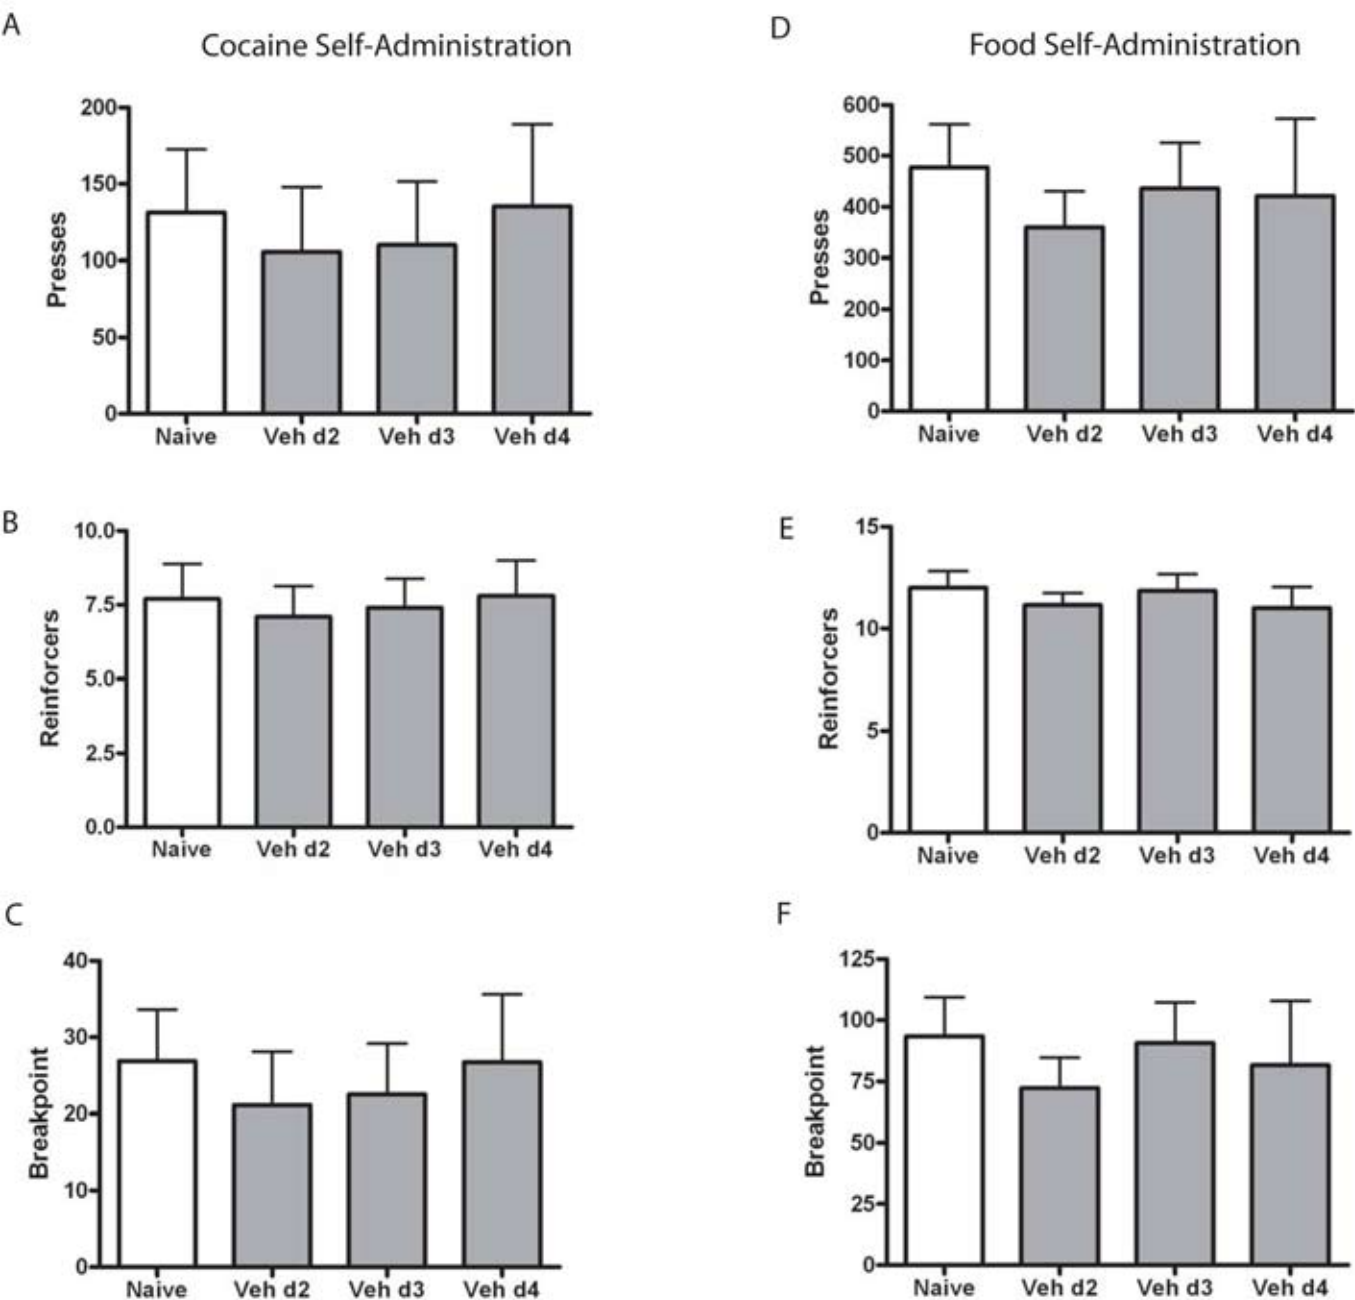

**Supplemental Figure 1. Rats did not extinguish cocaine or regular food-self administering behavior over 4-day progressive ratio testing.** Rats that self-administered cocaine (0.5 mg/infusion) and received vehicle injections (i.p.) on days 2, 3, and 4 showed no significant changes in (A) active lever presses, (B) cocaine infusions obtained, or (C) breakpoint over the 4 test days ( $n=10$ ,  $P>0.05$ ). Similarly, regular food self-administering rats receiving vehicle injections (i.p.) on days 2, 3, and 4 showed no significant changes in (D) active lever presses, (E) regular food pellets obtained, or (C) breakpoint over the 4 test days ( $n=8$ ,  $P>0.05$ ). Bars represent mean and s.e.m. Repeatedmeasures ANOVA with Bonferroni post-tests.
